# Supplementary material for: Hepatoprotective Effect of Cuscuta campestris Yunck. Whole Plant on Carbon Tetrachloride Induced Chronic Liver Injury in Mice
Source: MDPI journal article supplement (doi:10.3390/ijms17122056), 2016-12-07
Supplement: s1 [file s1]

## Supplementary Materials: Hepatoprotective Effect of *Cuscuta campestris* Yunck. Whole Plant on Carbon Tetrachloride Induced Chronic Liver Injury in Mice

Wen-Huang Peng, Yi-Wen Chen, Meng-Shiou Lee, Wen-Te Chang, Jen-Chieh Tsai, Ying-Chih Lin and Ming-Kuem Lin

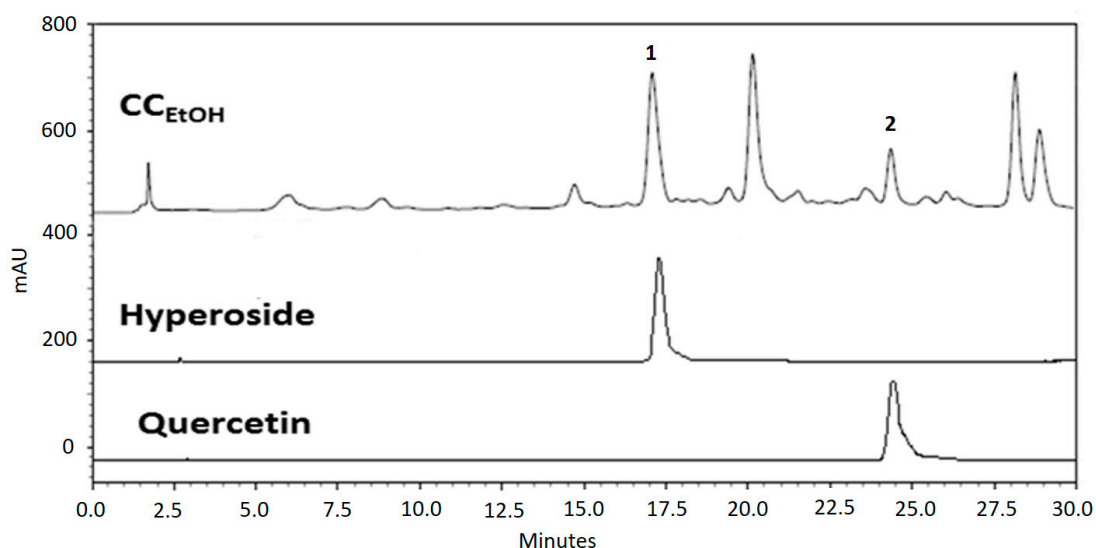

**Figure S1.** HPLC chromatographs of the ethanol extract of *Cuscuta campestris* whole plant and standards (hyperoside and quercetin). Peaks 1 and 2 are hyperoside and quercetin, respectively.
